# Supplementary material for: Oxidase Activity-Enhanced Manganese (III) Oxide Nanozyme Grown in Dendritic Mesoporous Silica Nanoparticles for Sensitive Lateral Flow Immunoassay of C-Reactive Protein
Source: Research Square preprint supplement (doi:10.21203/rs.3.rs-7822785/v1), 2025-11-05
Supplement: Supplementary file 1 [file c211451aa53ab2e6709a5b6b.docx]

**Table of Content**

This study optimized nanozyme catalytic performance by tuning material composition and nanostructure, constructing a H₂O₂-free colorimetric LFIA platform based on DMSN-confined Mn₂O₃. The platform achieved a CRP detection limit of 0.25 ng/mL, lower than those of previously reported nanozyme-based colorimetric LFIA methods.

Jiaqi Fang 1, Fang Gao 2* Ye Zhang 1, Yining Yao 3, Shaonian Ye 2, Chao Liu 1*, Chengzhong Yu 1 3*

**The material composition and nanostructure of nanozymes matters for Improving Lateral Flow Immunoassay Performance**

**
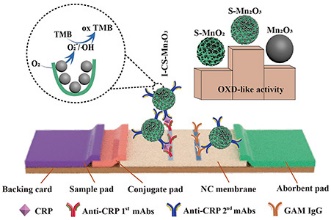
**
