# Supplementary material for: Oxidase Activity-Enhanced Manganese (III) Oxide Nanozyme Grown in Dendritic Mesoporous Silica Nanoparticles for Sensitive Lateral Flow Immunoassay of C-Reactive Protein
Source: Research Square preprint supplement (doi:10.21203/rs.3.rs-7822785/v1), 2025-11-05
Supplement: Supplementary file 2 [file e6647be24dc6a4f353cb641b.docx]

**Supporting Information**

**Oxidase Activity-Enhanced Manganese (III) Oxide Nanozyme Grown in Dendritic Mesoporous Silica Nanoparticles for Sensitive Lateral Flow Immunoassay of C-Reactive Protein**

Jiaqi Fang1, Fang Gao2, Ye Zhang1, Yining Yao3, Shaonian Ye2, Chao Liu1, Chengzhong Yu1,3

1 School of Chemistry and Molecular Engineering, East China Normal University, Shanghai, 200241, PR China

2 Institute of Energy Materials Science, University of Shanghai for Science and Technology, Shanghai, 200093, PR China

3 Australian Institute for Bioengineering and Nanotechnology, The University of Queensland Brisbane, Queensland 4072, Australia

*Corresponding Authors:

Fang Gao: [fgao@usst.edu.cn](mailto:fgao@usst.edu.cn)

Chao Liu: [cliu@chem.ecnu.edu.cn](mailto:cliu@chem.ecnu.edu.cn)

Chengzhong Yu: [c.yu@uq.edu.au](mailto:c.yu@uq.edu.au)


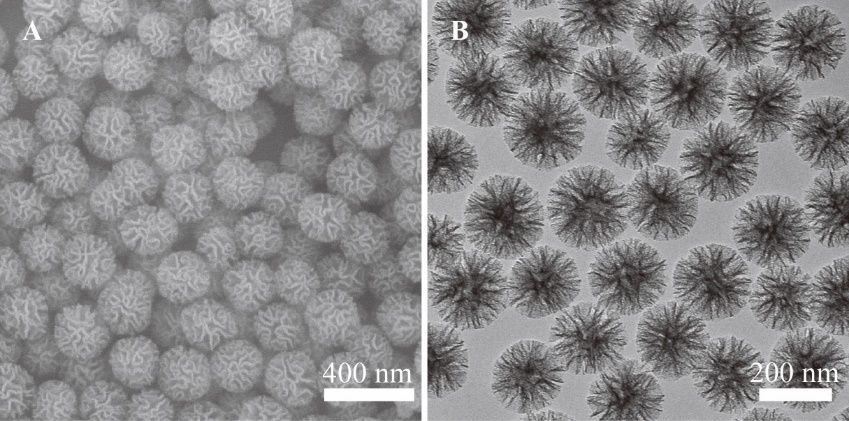


Fig. S1. (A) SEM and (B) TEM images of DMSN.


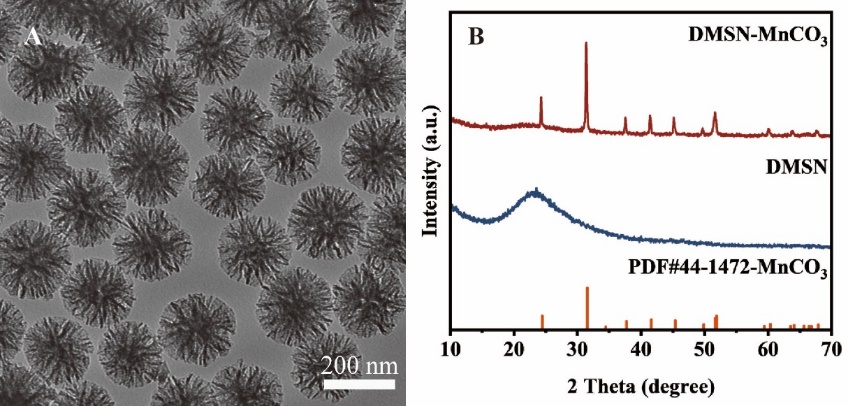


Fig. S2. (A) TEM image of DMSN-MnCO3. (B) XRD patterns of DMSN and DMSN-MnCO3.


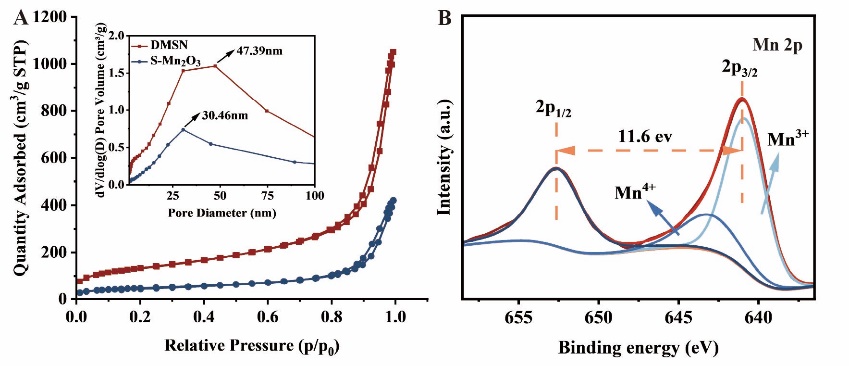


Fig. S3. (A) Nitrogen adsorption-desorption isotherms and corresponding pore size distribution curves (inset) for DMSN and S-Mn2O3. (B) Mn 2p XPS spectrum of S-Mn2O3.


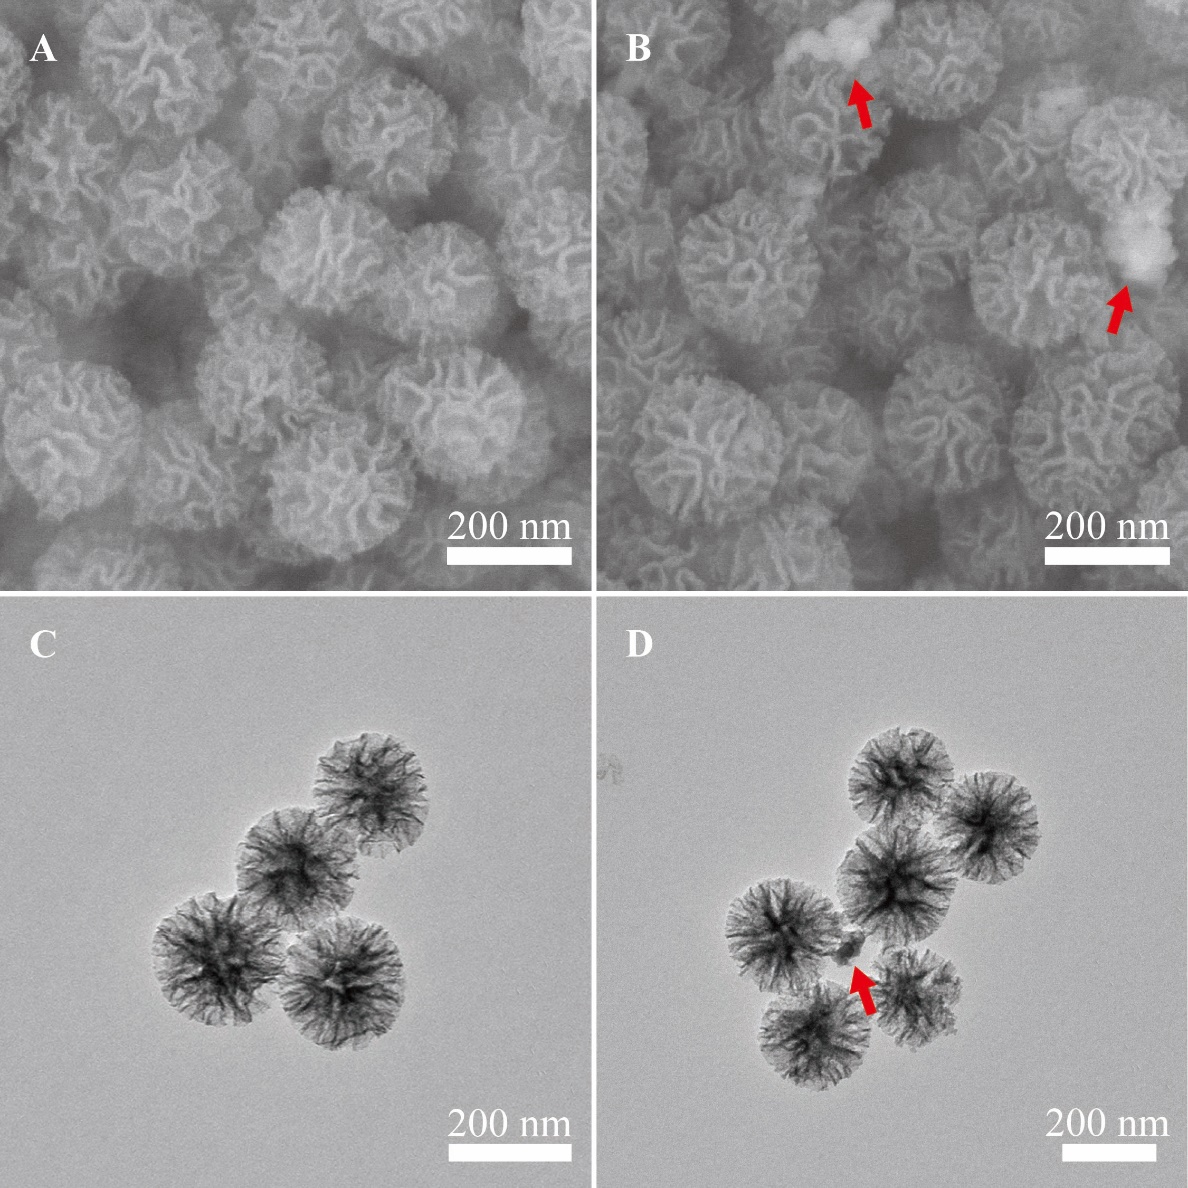


Fig. S4. SEM images of (A) S-Mn2O3-1 and (B) S-Mn2O3-2. TEM images of (C) S-Mn2O3-1 and (D) S-Mn2O3-2.


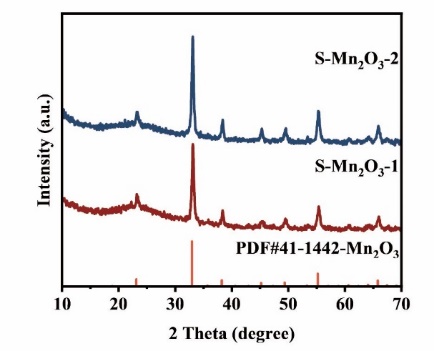


Fig. S5. XRD patterns of S-Mn2O3-1 and S-Mn2O3-2.


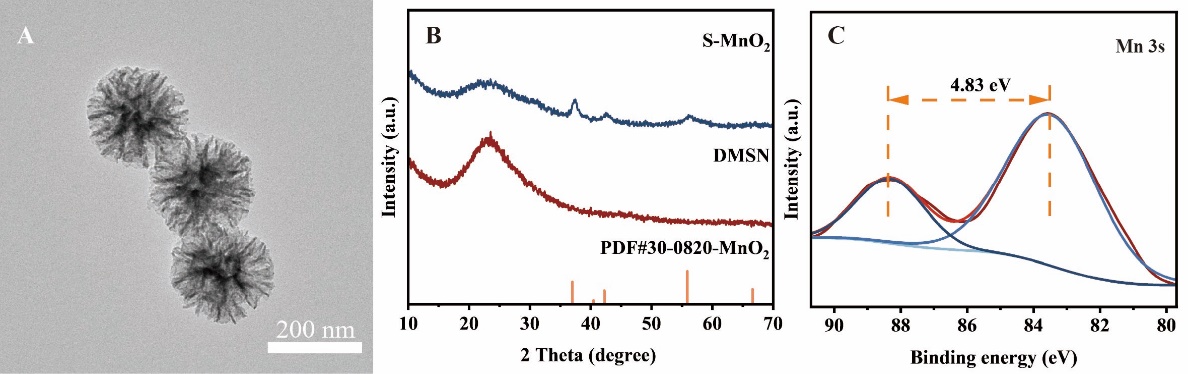


Fig. S6. (A) TEM image of S-MnO2. (B) XRD patterns of DMSN and S-MnO2. (C) Mn 3s XPS spectrum of S-MnO2.


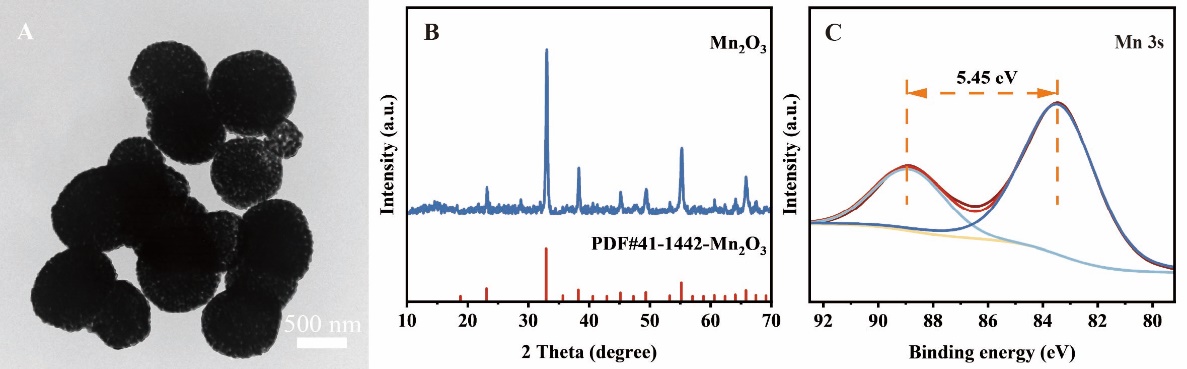


Fig. S7. (A) TEM image, (B) XRD pattern and (C) Mn 3s XPS spectrum of Mn2O3.


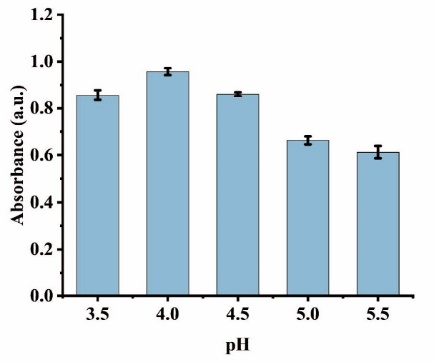


Fig. S8. Optimization of pH value.


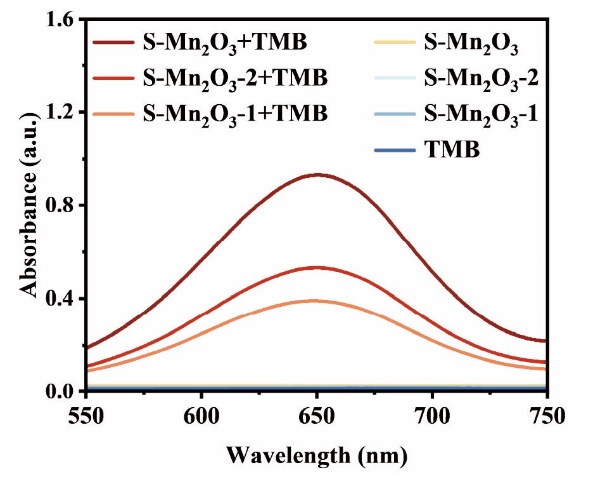


Fig. S9. UV–vis spectra of control solutions (sample-only), TMB working solution and catalyzed reaction solution of S-Mn2O3, S-Mn2O3-1and S-Mn2O3-2.


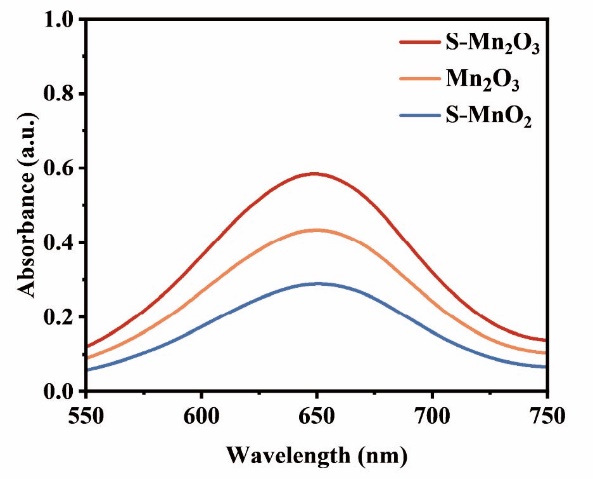


Fig. S10. Comparison of UV–vis spectra for TMB oxidation catalyzed by S-Mn2O3, Mn2O3 and S-MnO2.


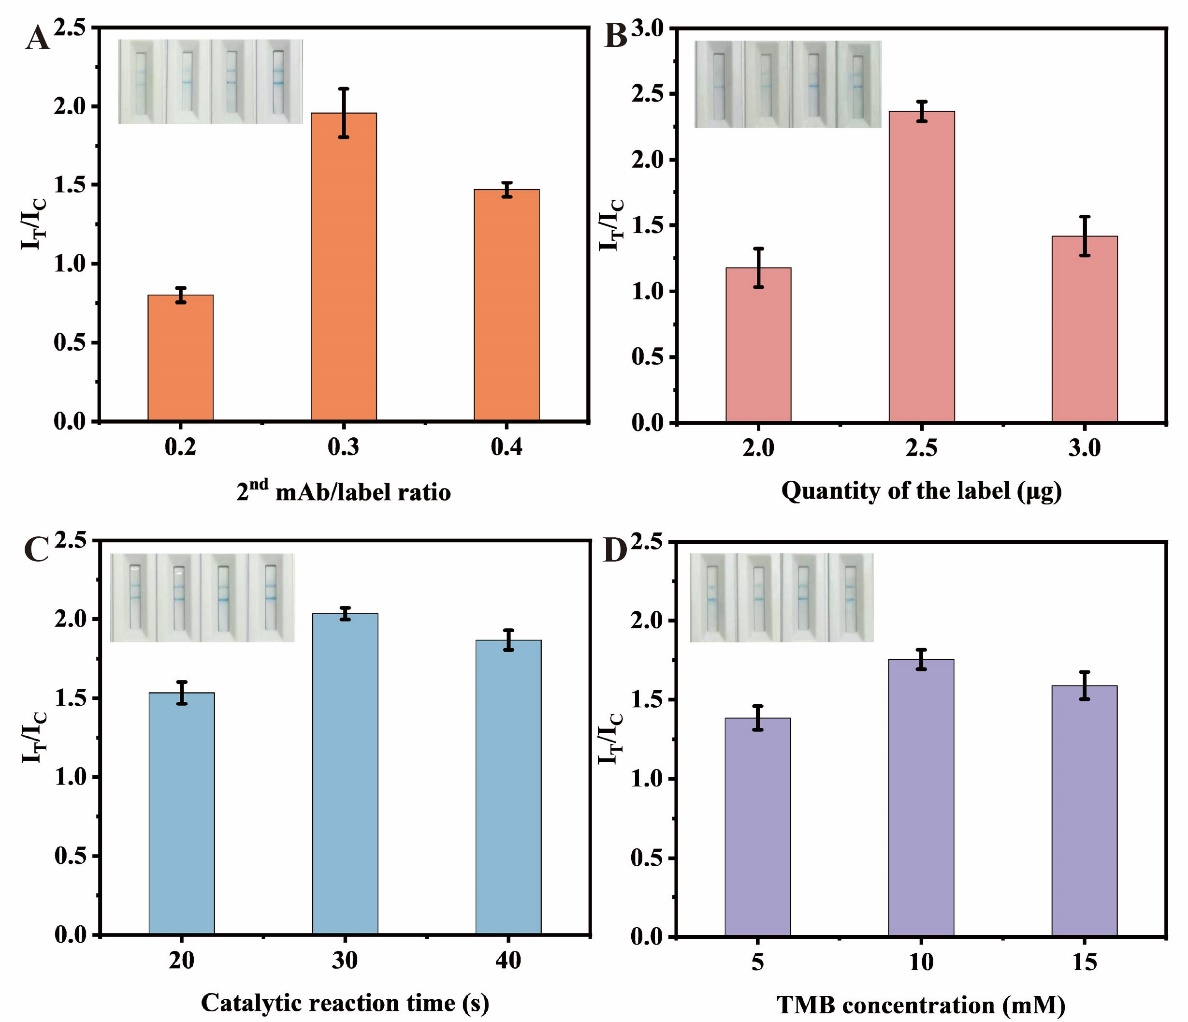


Fig. S11. Optimization of critical parameters for I-CS-Mn2O3-based LFIA. (A) The ratio of anti-CRP 2nd mAbs to CS-Mn2O3. (B) The quantity of I-CS-Mn2O3. (C) The catalytic reaction time. (D) The concentration of TMB.

Table S1. Manganese content of synthesized samples determined by ICP-OES

| Samples | Content (%) |
| --- | --- |
| S-Mn2O3-1 | 28.76 |
| S-Mn2O3 | 30.96 |
| S-Mn2O3-2 | 38.56 |

Table S2. Apparent kinetic parameters of S-Mn2O3-x (x = 0.75 and 1.25) nanozyme for TMB oxidation

| Samples | *K*m (mM) | *V*max (μM s-1) |
| --- | --- | --- |
| S-Mn2O3-1 | 0.232 | 0.503 |
| S-Mn2O3-2 | 0.243 | 0.344 |
